# Supplementary material
Source: Springer Nature journal article supplement (https://www.springermedizin.de/resource/supplementary/12958_2003_12_MOESM1_ESM.pdf/9566162)

**PRLR +/+**

**A**

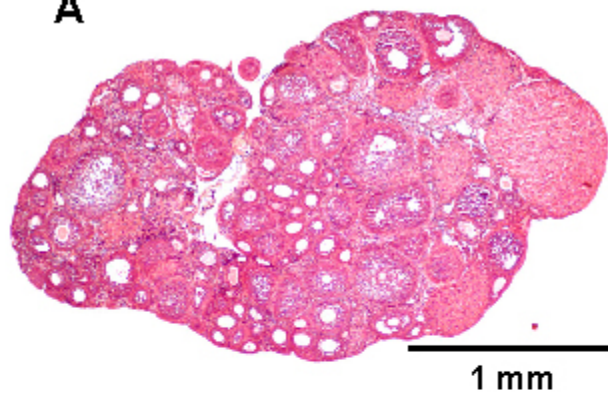

**PRLR -/-**

**B**

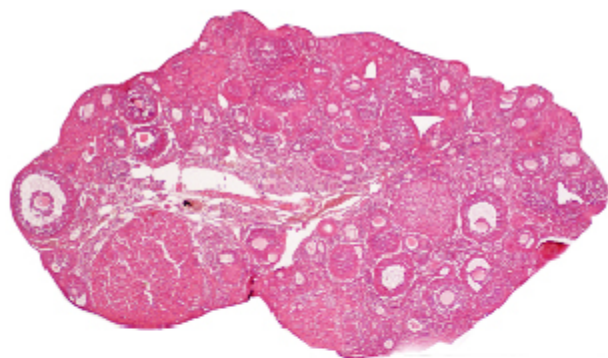

**C**

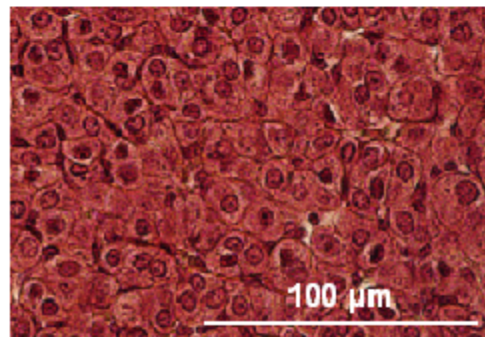

**D**

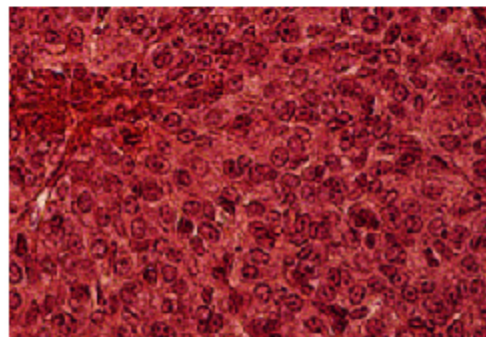

Supplement: MOESM1 [file 9566162]
